# Supplementary material
Source: PubMed Central journal article supplement (PMC4108476)

**Figure S1.** A strain (PK9523) containing chromosomally encoded *iscR* and *iscSUA-hscBA-fdx* under control of  $P_{tac}$  and  $P_{BAD}$ , respectively, was grown aerobically (open circles) or anaerobically (closed circles) in MOPS minimal media containing arabinose (0.2%), Tet ( $10 \mu\text{g ml}^{-1}$ ), and various concentrations of IPTG (0-640  $\mu\text{M}$ ).  $\beta$ -galactosidase activity from  $P_{iscR-lacZ}$  (recombined at the chromosomal *lac* region) was measured and normalized to the  $\beta$ -galactosidase activity determined for the strain lacking IscR (PK8677). The fold repression value was plotted against the IscR monomer concentration (nM) determined by Western blot analysis for each IPTG concentration tested. Shown is a representative data set for the experiment that was repeated at least three independent times. Dashed lines indicate the concentration of IscR at 50%  $P_{iscR}$  repression for this data set.

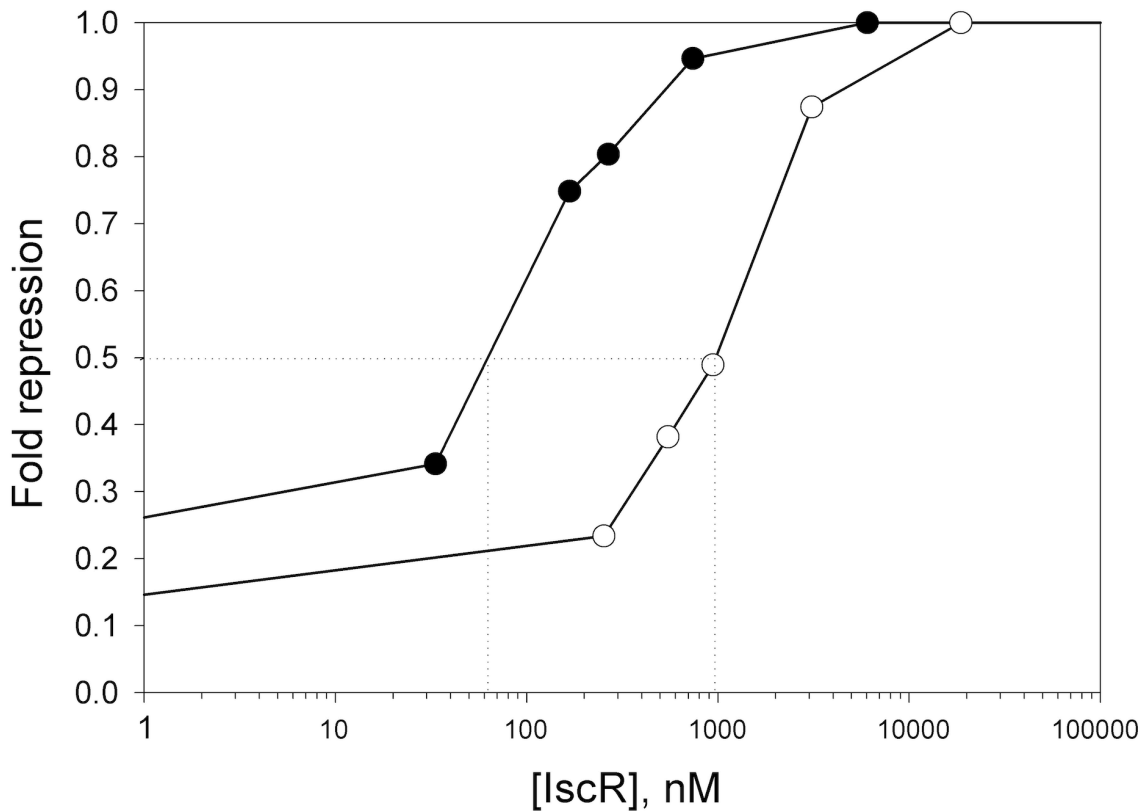

Supplement: NIHMS411083-supplement-Supp_Figure_S1.pdf [file NIHMS411083-supplement-Supp_Figure_S1.pdf]
